# Supplementary material for: Association between Edinburgh Postnatal Depression Scale and Serum Levels of Ketone Bodies and Vitamin D, Thyroid Function, and Iron Metabolism
Source: MDPI journal article supplement (doi:10.3390/nu15030768), 2023-02-02
Supplement: s1 [file s1]

**Table S1. Correlation between Edinburgh Postnatal Depression scale score and hematological factors**

|                                                      | EPDS at 3 day | <i>p</i> -value | EPDS at 1 month | <i>p</i> -value |
|------------------------------------------------------|---------------|-----------------|-----------------|-----------------|
| <b>Hematological factors during second trimester</b> |               |                 |                 |                 |
| Total ketones, μmol/L                                | 0.478         | <0.001          | 0.300           | 0.003           |
| 3-hydroxybutyric acid, μmol/L                        | 0.437         | <0.001          | 0.310           | 0.002           |
| Acetoacetic acid, μmol/L                             | 0.431         | <0.001          | 0.268           | 0.007           |
| Thyroid stimulating hormone, μIU/mL                  | -0.170        | 0.093           | -0.023          | 0.824           |
| Thyroxine, ng/dL                                     | -0.045        | 0.656           | 0.087           | 0.395           |
| Vitamin D, ng/mL                                     | 0.102         | 0.318           | 0.112           | 0.272           |
| Ferritin, ng/mL                                      | -0.021        | 0.834           | -0.085          | 0.405           |
| Iron, μg/dL                                          | -0.119        | 0.241           | -0.055          | 0.587           |
| Total iron binding capacity, μg/dL                   | 0.018         | 0.865           | -0.071          | 0.487           |
| <b>Hematological factors during third trimester</b>  |               |                 |                 |                 |
| Total ketones, μmol/L                                | 0.203         | 0.044           | 0.331           | <0.001          |
| 3-hydroxybutyric acid, μmol/L                        | 0.202         | 0.045           | 0.338           | <0.001          |
| Acetoacetic acid, μmol/L                             | 0.198         | 0.050           | 0.291           | 0.004           |
| Thyroid stimulating hormone, μIU/mL                  | -0.020        | 0.845           | 0.090           | 0.378           |
| Thyroxine, ng/dL                                     | 0.213         | 0.034           | 0.152           | 0.133           |
| Vitamin D, ng/mL                                     | 0.088         | 0.385           | 0.164           | 0.105           |
| Ferritin, ng/mL                                      | 0.063         | 0.536           | -0.004          | 0.966           |
| Iron, μg/dL                                          | 0.142         | 0.162           | 0.180           | 0.074           |
| Total iron binding capacity, μg/dL                   | -0.099        | 0.328           | -0.85           | 0.405           |
| <b>Hematological factors at postpartum day 1</b>     |               |                 |                 |                 |
| Total ketones, μmol/L                                | 0.163         | 0.108           | 0.169           | 0.095           |
| 3-hydroxybutyric acid, μmol/L                        | 0.173         | 0.087           | 0.171           | 0.091           |
| Acetoacetic acid, μmol/L                             | 0.104         | 0.305           | 0.123           | 0.225           |
| <b>Hematological factors at 1 month postpartum</b>   |               |                 |                 |                 |
| Total ketones, μmol/L                                | -0.052        | 0.607           | -0.042          | 0.678           |
| 3-hydroxybutyric acid, μmol/L                        | -0.071        | 0.486           | -0.064          | 0.527           |
| Acetoacetic acid, μmol/L                             | 0.027         | 0.793           | 0.050           | 0.622           |
| Thyroid stimulating hormone, μIU/mL                  | -0.130        | 0.211           | -0.011          | 0.919           |
| Thyroxine, ng/dL                                     | 0.105         | 0.299           | -0.081          | 0.428           |
| Vitamin D, ng/mL                                     | 0.020         | 0.841           | 0.246           | 0.014           |
| Ferritin, ng/mL                                      | 0.029         | 0.774           | 0.161           | 0.111           |
| Iron, μg/dL                                          | 0.028         | 0.103           | -0.103          | 0.312           |
| Total iron binding capacity, μg/dL                   | -0.089        | 0.379           | -0.059          | 0.564           |
